# Supplementary material
Source: ML conference proceedings conference paper supplement (https://openaccess.thecvf.com/content/CVPR2026/html/Adamkiewicz_When_Pretty_Isnt_CVPR_2026_paper.html)
Supplement: Supplementary file 1 [file Adamkiewicz_When_Pretty_Isnt_CVPR_2026_supplemental.pdf]

## Appendix

### A. Impact of the VAE

| VAE   | $Acc_{pixel}$ | $Acc_{highpass}$ | $Acc_{lowpass}$ |
|-------|---------------|------------------|-----------------|
| -     | 73.0          | 51.6             | 64.5            |
| SD1.5 | 70.5          | 37.6             | 63.1            |
| SDXL  | 69.7          | 37.1             | 62.8            |
| Flux  | 70.6          | 37.7             | 63.4            |

Table 1. We quantify the impact of the VAE by performing the reconstruction of our ImageNet subset and then training on it. An evaluation on unaltered real data reveals that the VAE accounts for a significant drop in accuracy in the high-frequency regime.

### B. Additional Vision Tasks

In addition to classification, we test object detection and segmentation to determine whether the observed trend holds across other vision tasks. Tested models do not all support additional spatial ques, so we label generated images using the SAM3 model to obtain bounding boxes and segmentation masks. Due to computational constraints, we reuse the pixel-space images from the class-name case of the main experiment. To provide a fair comparison with real data, the same labelling method is applied to the ImageNet images.

For object detection, we follow torchvision<sup>1</sup> recipe and train object detection Faster-RCNN with Imagenet1k Resnet-50 backbone for 26 epochs with Adam optimizer and batch size of 16. For segmentation, we also follow the torchvision recipe for the DeepLabv3 model with Imagenet1k Resnet-50 backbone. We train the model using the Adam optimizer for 30 epochs with a batch size of 20.

#### B.1. Object Detection

| Data Source           | Test Scores |                  |                  |
|-----------------------|-------------|------------------|------------------|
|                       | AP          | AP <sub>50</sub> | AP <sub>75</sub> |
| ImageNet              | 20.2        | 47.6             | 14.1             |
| SD V1.5 (Oct 2022)    | 11.9        | 32.1             | 6.2              |
| SD V3.0 (Feb 2024)    | 11.0        | 28.7             | 6.4              |
| Flux-dev (Aug 2024)   | 6.5         | 17.2             | 3.2              |
| Lumina2 (Jan 2025)    | 6.1         | 17.3             | 3.2              |
| Qwen-Image (Aug 2025) | 3.1         | 8.2              | 1.7              |

Table 2. Performance of the Faster-RCNN model evaluated on the ImageNet validation subset labeled with SAM3 using the COCO evaluation protocol. We observe that the downward trend also applies to the object detection task, with the SD15 model outperforming recent state-of-the-art models.

### B.2. Semantic Segmentation

| Data Source           | Test scores |      |       |            |
|-----------------------|-------------|------|-------|------------|
|                       | Pixel Acc   | mIoU | FWIoU | Dice Score |
| ImageNet              | 94.3        | 75.2 | 89.6  | 84.6       |
| SD V1.5 (Oct 2022)    | 87.9        | 49.3 | 79.1  | 62.6       |
| SD V3.0 (Feb 2024)    | 85.2        | 40.2 | 75.0  | 54.1       |
| Flux-dev (Aug 2024)   | 78.2        | 27.9 | 66.5  | 40.6       |
| Lumina2 (Jan 2025)    | 80.9        | 26.0 | 67.6  | 38.2       |
| Qwen-Image (Aug 2025) | 75.7        | 12.6 | 59.1  | 19.8       |

Table 3. Performance of the DeepLabv3 model evaluated on the ImageNet validation subset labeled with SAM3. We observe that the downward trend also applies to the semantic segmentation task, with the SD15 model outperforming recent state-of-the-art models.

### C. Performance on Synthetic Test Set

| Data Source  | Real Test Set |      |      | Synth Test Set |      |      |
|--------------|---------------|------|------|----------------|------|------|
|              | Acc           | AP   | mIoU | Acc            | AP   | mIoU |
| Imagenet     | 73.0          | 20.2 | 47.6 | -              | -    | -    |
| SD1.5        | 45.5          | 11.9 | 49.3 | 79.6           | 25.5 | 71.2 |
| SD2.1        | 30.5          | -    | -    | 51.6           | -    | -    |
| SDXL         | 30.5          | -    | -    | 83.2           | -    | -    |
| SDXL turbo   | 10.3          | -    | -    | 99.2           | -    | -    |
| SD3.0        | 39.4          | 11.0 | 40.2 | 92.6           | 47.7 | 81.9 |
| SD3.5 medium | 38.9          | -    | -    | 94.6           | -    | -    |
| SD3.5 large  | 28.2          | -    | -    | 77.6           | -    | -    |
| SD3.5 turbo  | 15.0          | -    | -    | 97.6           | -    | -    |
| Sana         | 22.1          | -    | -    | 97.3           | -    | -    |
| Flux-dev     | 19.3          | 6.5  | 27.9 | 95.5           | 50.1 | 88.1 |
| Flux-schnell | 16.1          | -    | -    | 94.4           | -    | -    |
| Lumina2      | 24.7          | 6.1  | 26.0 | 93.3           | 41.9 | 81.6 |
| Qwen         | 9.9           | 3.1  | 12.6 | 97.9           | 69.5 | 93.7 |

Table 4. We evaluate the trained model on the same-sized synthetic validation set obtained from the same data source. We find that synthetic models generally achieve a much higher performance than on the real test set. This excludes bad fit as the source of the observed trend and instead strongly hints at a more easily class-separable data manifold. Accuracy (Acc) reported for the Resnet-50 network.

<sup>1</sup><https://github.com/pytorch/vision/tree/6f131f1f56f1b78c6301eb4>

## D. Scaling Behavior of Synthetic Data

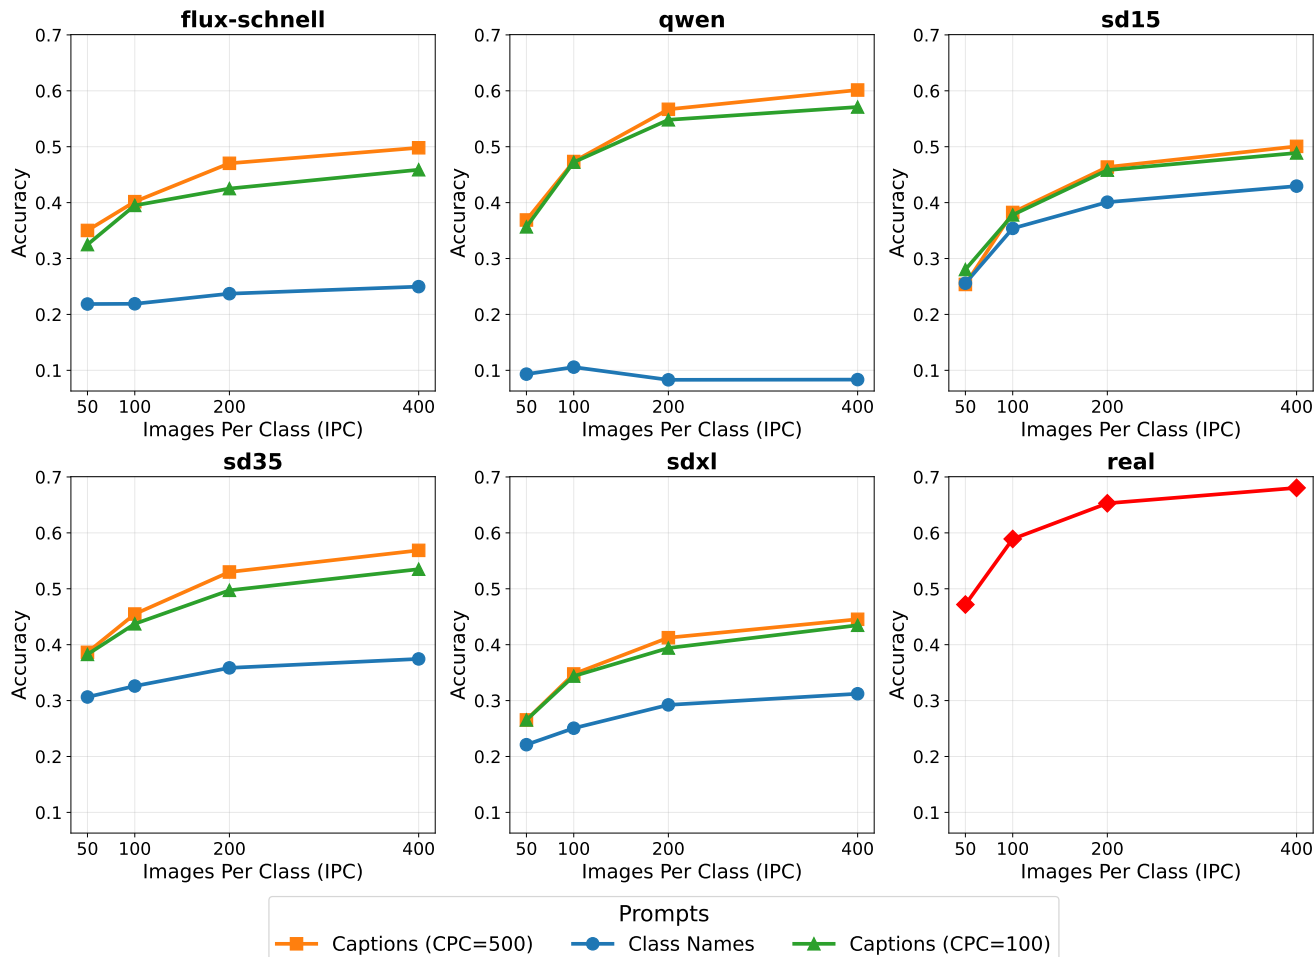

Figure 7. We investigate the scaling of the performance as a function of the number of Images per Class (IPC). We compare class-name prompts to image captions. We additionally test whether generating multiple images from the same caption impacts scaling. To test this, we also add a case in which the number of captions per class (CPC) is reduced to 100 (we generate 5 images per prompt). We observe that models which perform well with captions (qwen, flux-schnell, sd35). Exhibit a significant disparity between the scaling law of class name prompts and caption prompts. Additionally, we observe that when the number of unique prompts is reduced, those models also exhibit a bigger gap in scaling than models performing well with class names. This highlights the importance of using a diverse set of detail prompts for generation with recent models.

## E. Synthetic Image Samples

Table 5. We visualize random samples from selected classes in the synthetic training dataset. Models are sorted by release date. Many of the tested models exhibit a distinct "visual style" that differs from real data. For example, select models (SDXL and pixelart) are biased towards stylistic, art-like images by default, rather than photorealistic images when the prompt is underspecified. Newer models tend to produce high-fidelity images; however, backgrounds often become blurry or plain, with the main object clearly visible and centered in the frame.

| Data Source     | Sample Images (Class Name Prompts)                                                   |  |  |  |  |
|-----------------|--------------------------------------------------------------------------------------|--|--|--|--|
| <b>Goldfish</b> |                                                                                      |  |  |  |  |
| ImageNet        |    |  |  |  |  |
| sd15            |    |  |  |  |  |
| sd21            |   |  |  |  |  |
| sdxl            |  |  |  |  |  |
| pixelart        |  |  |  |  |  |

*Continued on next page*

Table 5 – Continued from previous page

| Data Source  | Sample Images (Class Name Prompts) |  |  |  |  |
|--------------|------------------------------------|--|--|--|--|
| sdxl-turbo   |                                    |  |  |  |  |
| sd30         |                                    |  |  |  |  |
| flux-dev     |                                    |  |  |  |  |
| flux-schnell |                                    |  |  |  |  |
| sd35         |                                    |  |  |  |  |
| sd35-large   |                                    |  |  |  |  |

Continued on next page

Table 5 – Continued from previous page

| Data Source    | Sample Images (Class Name Prompts)                                                   |  |  |  |  |
|----------------|--------------------------------------------------------------------------------------|--|--|--|--|
| sd35-turbo     | 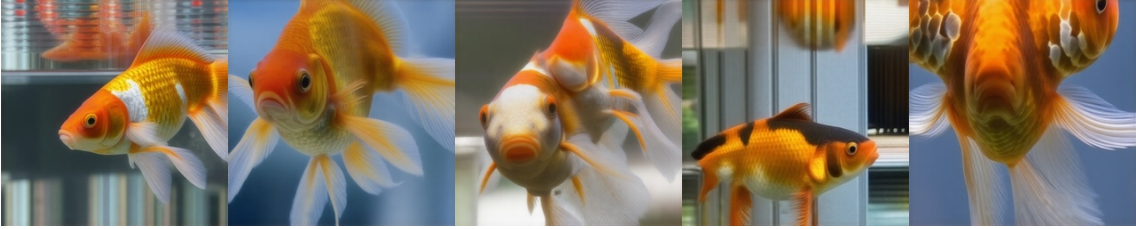   |  |  |  |  |
| sana           |    |  |  |  |  |
| lumina2        |    |  |  |  |  |
| qwen           |   |  |  |  |  |
| <b>Monarch</b> |                                                                                      |  |  |  |  |
| ImageNet       |  |  |  |  |  |
| sd15           |  |  |  |  |  |

Continued on next page

Table 5 – Continued from previous page

| Data Source | Sample Images (Class Name Prompts) |  |  |  |  |
|-------------|------------------------------------|--|--|--|--|
| sd21        |                                    |  |  |  |  |
| sdxl        |                                    |  |  |  |  |
| pixelart    |                                    |  |  |  |  |
| sdxl-turbo  |                                    |  |  |  |  |
| sd30        |                                    |  |  |  |  |
| flux-dev    |                                    |  |  |  |  |

Continued on next page

Table 5 – Continued from previous page

| Data Source  | Sample Images (Class Name Prompts)                                                   |
|--------------|--------------------------------------------------------------------------------------|
| flux-schnell |    |
| sd35         |    |
| sd35-large   |    |
| sd35-turbo   |   |
| sana         |  |
| lumina2      |  |

Continued on next page

Table 5 – Continued from previous page

| Data Source  | Sample Images (Class Name Prompts)                                                   |  |  |  |  |
|--------------|--------------------------------------------------------------------------------------|--|--|--|--|
| qwen         |    |  |  |  |  |
| <b>Koala</b> |                                                                                      |  |  |  |  |
| ImageNet     |    |  |  |  |  |
| sd15         |    |  |  |  |  |
| sd21         |   |  |  |  |  |
| sdxl         |  |  |  |  |  |
| pixelart     |  |  |  |  |  |

Continued on next page

Table 5 – Continued from previous page

| Data Source  | Sample Images (Class Name Prompts)                                                   |
|--------------|--------------------------------------------------------------------------------------|
| sdxl-turbo   |    |
| sd30         |    |
| flux-dev     |    |
| flux-schnell |   |
| sd35         |  |
| sd35-large   |  |

Continued on next page

Table 5 – Continued from previous page

| Data Source  | Sample Images (Class Name Prompts) |  |  |  |  |
|--------------|------------------------------------|--|--|--|--|
| sd35-turbo   |                                    |  |  |  |  |
| sana         |                                    |  |  |  |  |
| lumina2      |                                    |  |  |  |  |
| qwen         |                                    |  |  |  |  |
| <b>Broom</b> |                                    |  |  |  |  |
| ImageNet     |                                    |  |  |  |  |
| sd15         |                                    |  |  |  |  |

Continued on next page

Table 5 – Continued from previous page

| Data Source | Sample Images (Class Name Prompts) |  |  |  |  |
|-------------|------------------------------------|--|--|--|--|
| sd21        |                                    |  |  |  |  |
| sdxl        |                                    |  |  |  |  |
| pixelart    |                                    |  |  |  |  |
| sdxl-turbo  |                                    |  |  |  |  |
| sd30        |                                    |  |  |  |  |
| flux-dev    |                                    |  |  |  |  |

Continued on next page

Table 5 – Continued from previous page

| Data Source  | Sample Images (Class Name Prompts)                                                   |  |  |  |  |
|--------------|--------------------------------------------------------------------------------------|--|--|--|--|
| flux-schnell |    |  |  |  |  |
| sd35         |    |  |  |  |  |
| sd35-large   |    |  |  |  |  |
| sd35-turbo   |   |  |  |  |  |
| sana         |  |  |  |  |  |
| lumina2      |  |  |  |  |  |

Continued on next page

Table 5 – Continued from previous page

| Data Source | Sample Images (Class Name Prompts)                                                 |  |  |  |  |
|-------------|------------------------------------------------------------------------------------|--|--|--|--|
| qwen        |  |  |  |  |  |

Table 6. We visualize samples generated from images with class name and caption prompts. We see that using detailed captions significantly improves the diversity and realism of the synthetic data, matching the observed boost in model performance.

| Model           | Class Name Prompt                                                                   | Caption Prompt                                                                       |
|-----------------|-------------------------------------------------------------------------------------|--------------------------------------------------------------------------------------|
| <b>goldfish</b> |                                                                                     |                                                                                      |
| sd15            |    |    |
| sd21            |   |   |
| sdxl            |  |  |
| pixelart        |  |  |
| sdxl-turbo      |  |  |
| sd30            |  |  |
| flux dev        |  |  |

Continued on next page

Table 6 – Continued from previous page

| Model          | Class Name Prompt                                                                   | Caption Prompt                                                                       |
|----------------|-------------------------------------------------------------------------------------|--------------------------------------------------------------------------------------|
| flux-schnell   |    |    |
| sd35           |    |    |
| sd35-large     |    |    |
| sd35-turbo     |    |    |
| sana           |   |   |
| qwen           |  |  |
| <b>monarch</b> |                                                                                     |                                                                                      |
| sd15           |  |  |
| sd21           |  |  |
| sdxl           |  |  |
| pixelart       |  |  |

Continued on next page

Table 6 – Continued from previous page

| Model        | Class Name Prompt                                                                   | Caption Prompt                                                                       |
|--------------|-------------------------------------------------------------------------------------|--------------------------------------------------------------------------------------|
| sdxl-turbo   |    |    |
| sd30         |    |    |
| flux dev     |    |    |
| flux-schnell |    |    |
| sd35         |   |   |
| sd35-large   |  |  |
| sd35-turbo   |  |  |
| sana         |  |  |
| qwen         |  |  |
| <b>koala</b> |                                                                                     |                                                                                      |
| sd15         |  |  |

Continued on next page

Table 6 – Continued from previous page

| Model        | Class Name Prompt                                                                   | Caption Prompt                                                                       |
|--------------|-------------------------------------------------------------------------------------|--------------------------------------------------------------------------------------|
| sd21         |    |    |
| sdxl         |    |    |
| pixelart     |    |    |
| sdxl-turbo   |    |    |
| sd30         |   |   |
| flux dev     |  |  |
| flux-schnell |  |  |
| sd35         |  |  |
| sd35-large   |  |  |
| sd35-turbo   |  |  |

Continued on next page

Table 6 – Continued from previous page

| Model        | Class Name Prompt                                                                   | Caption Prompt                                                                       |
|--------------|-------------------------------------------------------------------------------------|--------------------------------------------------------------------------------------|
| sana         |    |    |
| qwen         |    |    |
| <b>broom</b> |                                                                                     |                                                                                      |
| sd15         |    |    |
| sd21         |    |    |
| sdxl         |   |   |
| pixelart     |  |  |
| sdxl-turbo   |  |  |
| sd30         |  |  |
| flux dev     |  |  |
| flux-schnell |  |  |

Continued on next page

Table 6 – Continued from previous page

| Model      | Class Name Prompt                                                                  | Caption Prompt                                                                      |
|------------|------------------------------------------------------------------------------------|-------------------------------------------------------------------------------------|
| sd35       |   |   |
| sd35-large |   |   |
| sd35-turbo |   |   |
| sana       |   |   |
| qwen       |  |  |

## F. Image Caption Samples

Table 7. The table below contains sample captions that were used as prompts in the paper. Captions were obtained through prompting the GPT4-nano model.

| Image                                                                               | Caption                                                                                                                                                                                                                                                                                                                                                                                                                                                                                        |
|-------------------------------------------------------------------------------------|------------------------------------------------------------------------------------------------------------------------------------------------------------------------------------------------------------------------------------------------------------------------------------------------------------------------------------------------------------------------------------------------------------------------------------------------------------------------------------------------|
|    | <p>The image features a woman standing on a wooden patio, framed by an open door in the foreground. She is holding a large umbrella against the backdrop of a brick house and a small garden area, with outdoor furniture and a grayish sky indicating an overcast day. The camera angle captures her from a straight-on perspective, focusing on her entire body and the surrounding outdoor setting.</p>                                                                                     |
|    | <p>The image captures an indoor setting with stair steps viewed from a slightly elevated angle, focusing on the black metal handrail and the dark stairs below. In the background, a glass railing and the railing's supporting structure are visible, contributing to a modern architectural aesthetic. The lighting is subdued, emphasizing the metallic and glass materials in the scene.</p>                                                                                               |
|   | <p>The image features a religious display set against a richly decorated interior with vertical, multicolored striped curtains and ornate wood paneling. In the foreground, a pedestal supports a statue of Jesus Christ on the cross, flanked by two golden lion-like sculptures with outstretched paws. The camera angle is slightly upward, emphasizing the statue and the intricate details of the backdrop.</p>                                                                           |
|  | <p>The image displays a dense layer of golden-brown pretzels filling the entire frame, creating a textured background. The foreground is dominated by the uniform, shiny pretzels, shot from a close-up, slightly overhead camera angle that emphasizes their shape and glossiness. There are no other distinct objects or elements visible in the background.</p>                                                                                                                             |
|  | <p>A rugby match takes place outdoors on a lush green field, with a blurred background of trees indicating a park-like setting. In the foreground, two players are engaged in a tense tackle, with one player wearing a white shirt and gray shorts holding the rugby ball, while the other, in a red and black jersey, attempts to challenge him. The camera angle is slightly tilted and close-up, capturing the intensity of the moment and emphasizing the players' dynamic movements.</p> |
|  | <p>The image features a lush, well-maintained garden area overlooking a body of water, with a few tall palm trees in the background. In the foreground, a traditionally dressed performer with a lei around his neck holds a lit torch or flame, standing on a paved surface. The camera angle captures him at eye level, emphasizing his cultural attire and the scenic outdoor setting behind him.</p>                                                                                       |

*Continued on next page*

Table 7 – Continued from previous page

| Image                                                                               | Caption                                                                                                                                                                                                                                                                                                                                                                                                            |
|-------------------------------------------------------------------------------------|--------------------------------------------------------------------------------------------------------------------------------------------------------------------------------------------------------------------------------------------------------------------------------------------------------------------------------------------------------------------------------------------------------------------|
|    | <p>The image features a close-up side profile of a golden retriever with a friendly expression, its mouth slightly open and tongue visible. The dog is wearing a collar with a paw print tag and is captured from a slightly lower angle, highlighting its head and upper body. In the background, there is a snowy landscape with trees and falling snowflakes, creating a wintery atmosphere.</p>                |
|    | <p>The image depicts a covered porch or veranda with a row of wooden rocking chairs arranged along the railing, facing outward. The background features a misty, foggy landscape with leafless trees, creating a serene and slightly mysterious ambiance. The camera angle is level with the chairs, capturing the perspective of someone standing on the porch looking toward the landscape.</p>                  |
|   | <p>A young man is sitting on a boat or dock near the water, wearing a bright yellow life jacket. He is smiling and looking toward the camera, with an ocean or large body of water and an overcast sky in the background. The image is taken from a slightly low angle, capturing his upper body and part of his legs, with the water stretching out behind him.</p>                                               |
|  | <p>The image features a close-up view of a fire salamander with striking black and yellow coloration, positioned amidst lush green grass. The camera angle captures the salamander from a top-down perspective, highlighting its elongated body, glossy skin, and distinctive markings. The background consists of dense, vibrant grass blades, providing a natural and contrasting setting for the amphibian.</p> |

## G. Imagenet-1k Subset

Table 8. We visualize image samples from the subset of the imagenet-1k (200 classes, 500 IPC) that we use as real data in our experiments

| Class Name               | Sample Images                                                                        |
|--------------------------|--------------------------------------------------------------------------------------|
| goldfish                 |    |
| european fire salamander |    |
| bullfrog                 |    |
| tailed frog              |    |
| american alligator       |    |
| boa constrictor          |    |
| trilobite                |    |
| scorpion                 |    |
| black widow              |   |
| tarantula                |  |
| centipede                |  |
| goose                    |  |
| koala                    |  |
| jellyfish                |  |
| brain coral              |  |
| snail                    |  |
| slug                     |  |
| sea slug                 |  |
| american lobster         |  |

*Continued on next page*

Table 8 – Continued from previous page

| Class Name         | Sample Images |
|--------------------|---------------|
| spiny lobster      |               |
| black stork        |               |
| king penguin       |               |
| albatross          |               |
| dugong             |               |
| chihuahua          |               |
| yorkshire terrier  |               |
| golden retriever   |               |
| labrador retriever |               |
| german shepherd    |               |
| standard poodle    |               |
| tabby cat          |               |
| persian cat        |               |
| egyptian cat       |               |
| cougar             |               |
| lion               |               |
| brown bear         |               |
| ladybug            |               |
| fly                |               |
| bee                |               |
| grasshoppe         |               |

Continued on next page

Table 8 – Continued from previous page

| Class Name        | Sample Images |
|-------------------|---------------|
| walking stick     |               |
| cockroach         |               |
| mantis            |               |
| dragonfly         |               |
| monarch           |               |
| sulphur butterfly |               |
| sea cucumber      |               |
| guinea pig        |               |
| hog               |               |
| ox                |               |
| bison             |               |
| bighorn           |               |
| gazelle           |               |
| arabian camel     |               |
| orangutan         |               |
| chimpanzee        |               |
| baboon            |               |
| african elephant  |               |
| panda             |               |
| abacus            |               |
| academic gown     |               |

Continued on next page

Table 8 – Continued from previous page

| Class Name   | Sample Images |
|--------------|---------------|
| altar        |               |
| apron        |               |
| backpack     |               |
| bannister    |               |
| barbershop   |               |
| barn         |               |
| barrel       |               |
| basketball   |               |
| bathtub      |               |
| beach wagon  |               |
| beacon       |               |
| beaker       |               |
| beer bottle  |               |
| bikini       |               |
| binoculars   |               |
| birdhouse    |               |
| bow tie      |               |
| brass        |               |
| broom        |               |
| bucket       |               |
| bullet train |               |

Continued on next page

Table 8 – Continued from previous page

| Class Name         | Sample Images |
|--------------------|---------------|
| butcher shop       |               |
| candle             |               |
| cannon             |               |
| cardigan           |               |
| cash machine       |               |
| CD player          |               |
| chain              |               |
| chest              |               |
| christmas stocking |               |
| cliff dwelling     |               |
| computer keyboard  |               |
| confectionery      |               |
| convertible        |               |
| crane              |               |
| dam                |               |
| desk               |               |
| dining table       |               |
| drumstick          |               |
| dumbbell           |               |
| flagpole           |               |
| fountain           |               |

Continued on next page

Table 8 – Continued from previous page

| Class Name       | Sample Images |
|------------------|---------------|
| freight car      |               |
| frying pan       |               |
| fur coat         |               |
| gasmask          |               |
| go-kart          |               |
| gondola          |               |
| hourglass        |               |
| iPod             |               |
| jinrikisha       |               |
| kimono           |               |
| lampshade        |               |
| lawn mower       |               |
| lifeboat         |               |
| limousine        |               |
| magnetic compass |               |
| maypole          |               |
| military uniform |               |
| miniskirt        |               |
| moving van       |               |
| nail             |               |
| neck brace       |               |

Continued on next page

Table 8 – Continued from previous page

| Class Name     | Sample Images |
|----------------|---------------|
| obelisk        |               |
| oboe           |               |
| pipe organ     |               |
| parking meter  |               |
| pay-phone      |               |
| picket fence   |               |
| pill bottle    |               |
| plunger        |               |
| pole           |               |
| police van     |               |
| poncho         |               |
| pop bottle     |               |
| potter's wheel |               |
| projectile     |               |
| punching bag   |               |
| reel           |               |
| refrigerator   |               |
| remote control |               |
| rocking chair  |               |
| rugby ball     |               |
| sandal         |               |

Continued on next page

Table 8 – Continued from previous page

| Class Name        | Sample Images |
|-------------------|---------------|
| school bus        |               |
| scoreboard        |               |
| sewing machine    |               |
| snorkel           |               |
| sock              |               |
| sombrero          |               |
| space heater      |               |
| spider web        |               |
| sports car        |               |
| steel arch bridge |               |
| stopwatch         |               |
| sunglasses        |               |
| suspension bridge |               |
| swimming trunks   |               |
| syringe           |               |
| teapot            |               |
| teddy bear        |               |
| thatched roof     |               |
| torch             |               |
| tractor           |               |
| triumphal arch    |               |

Continued on next page

Table 8 – Continued from previous page

| Class Name    | Sample Images |
|---------------|---------------|
| trolleybus    |               |
| turnstile     |               |
| umbrella      |               |
| vestment      |               |
| viaduct       |               |
| volleyball    |               |
| water jug     |               |
| water tower   |               |
| wok           |               |
| wooden spoon  |               |
| comic book    |               |
| plate         |               |
| guacamole     |               |
| ice cream     |               |
| lollipop      |               |
| pretzel       |               |
| mashed potato |               |
| cauliflower   |               |
| bell pepper   |               |
| mushroom      |               |
| orange        |               |

Continued on next page

Table 8 – Continued from previous page

| Class Name  | Sample Images |
|-------------|---------------|
| lemon       |               |
| banana      |               |
| pomegranate |               |
| meat loaf   |               |
| pizza       |               |
| potpie      |               |
| espresso    |               |
| alp         |               |
| cliff       |               |
| coral reef  |               |
| lakeside    |               |
| seashore    |               |
| acorn       |               |
